# Supplementary material
Source: PubMed Central journal article supplement (PMC4513984)

**Supplemental Figure 1.** Investigation into the prevalence of 6-keto-PGF<sub>1α</sub>-EA (**A**) in rabbit corneal homogenate, analysed by LC/ESI-MS/MS. Sample reconstructed ion chromatograms of corneal extract following the transitions  $m/z$  414>396,  $m/z$  414>378,  $m/z$  414>3360,  $m/z$  414>62 (**B**) and SIR of  $m/z$  414 [M+H]<sup>+</sup>(**C**). Indomethacin treatment of A-EA supplemented corneal extract shows that the peak eluting at 1.22 min is affected by the treatment suggesting that it may be enzymatically produced (**D, E, F, H**).

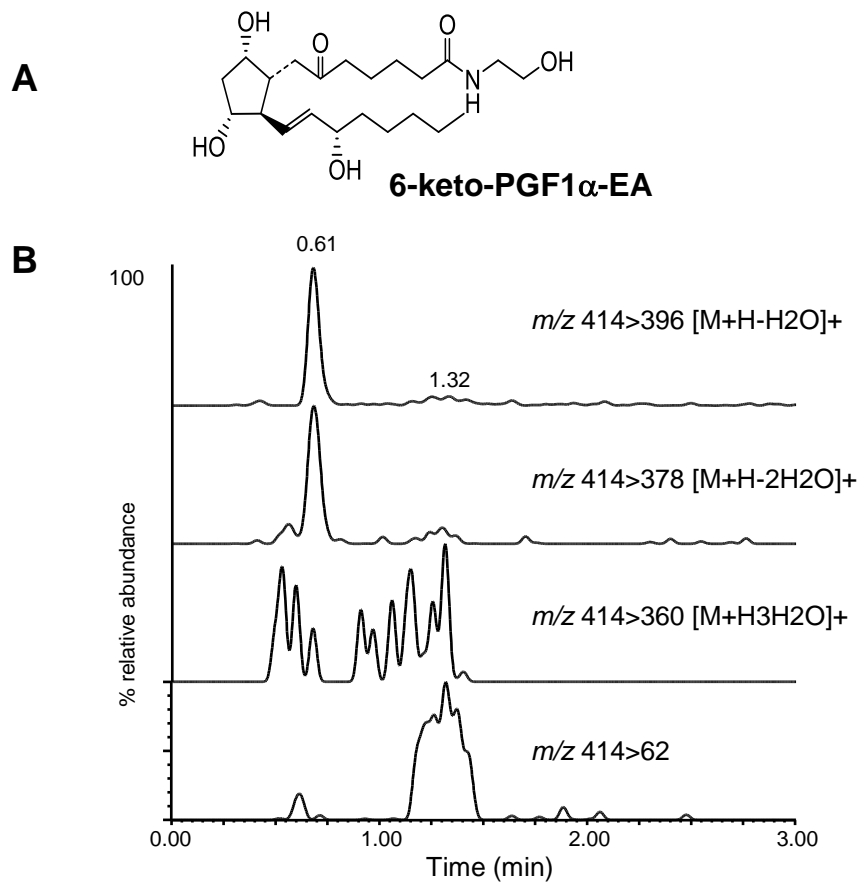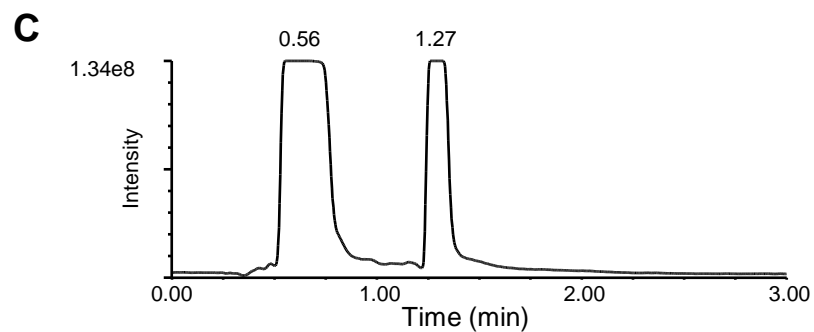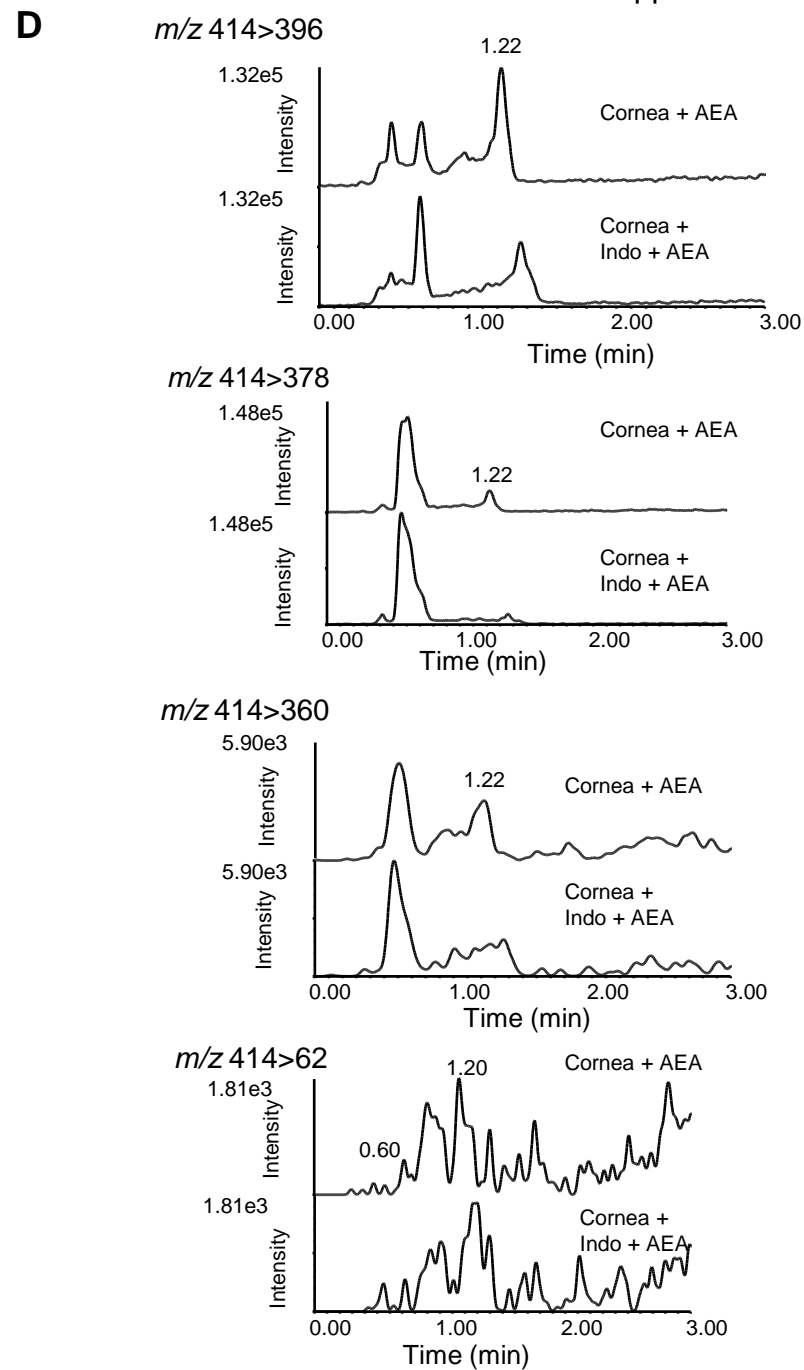

Supplement: supp_M055772_jlr.M055772-1.pdf [file supp_M055772_jlr.M055772-1.pdf]
